# Supplementary material
Source: PubMed Central journal article supplement (PMC3145047)
Supplement: NIHMS310689-supplement-1_si_001.pdf [file NIHMS310689-supplement-1_si_001.pdf]

# On the nature of the oxidative heterocoupling of lithium enolates

Brian M. Casey and Robert A. Flowers, II\*

*Department of Chemistry, Lehigh University, Bethlehem, Pennsylvania 18015*

Email: rof2@lehigh.edu

## Supporting Information

|                                                                            |     |
|----------------------------------------------------------------------------|-----|
| Instrumentation                                                            | S2  |
| Materials for $^7\text{Li}$ NMR experiments                                | S2  |
| Materials for oxidative heterocoupling reactions                           | S2  |
| General procedure for the determination of lithium enolate aggregation     | S3  |
| General procedure for the oxidative heterocoupling of lithium enolates     | S3  |
| $^7\text{Li}$ NMR spectral data of lithium enolate aggregates              | S4  |
| Spectral data for heterocoupled products                                   | S5  |
| Plot of heteroaggregation <i>versus</i> heterocoupling of lithium enolates | S7  |
| $^7\text{Li}$ NMR spectra of lithium enolate aggregates                    | S8  |
| $^1\text{H}$ NMR and $^{13}\text{C}$ NMR spectra of heterocoupled products | S14 |

## **Instrumentation**

Proton, carbon, and lithium NMR were recorded on a Bruker 500 MHz spectrometer. GC-MS analyses were performed with an HP 5890 Series II Gas Chromatograph with an HP Mass Selector Detector. LC-HRMS data were recorded at the Mass Spectrometry Facility at Notre Dame University. Column chromatography was performed using the automated CombiFlash® Rf system from Teledyne Isco, Inc. Products were separated using prepacked silica gel columns with a gradient elution of either ethyl acetate:hexanes or diethyl ether:hexanes.

## **Materials for <sup>7</sup>Li NMR experiments**

THF was purified with a Pure Solv solvent purification system from Innovative Technology, Inc. Toluene was degassed with argon for 1 hour and then stored over activated 3 Å molecular sieves under an inert atmosphere. A stock solution of 2.0M THF/toluene was prepared by diluting 8.1 mL of THF to a final volume of 50 mL with toluene. LiHMDS was purchased from Sigma Aldrich as a white solid and used without further purification. All ketones were purchased from Alfa Aesar or Acros Organics and purified by short-path distillation, recrystallization from *n*-pentane, or column chromatography prior to use. As a reference and locking signal, 0.3M LiCl in CD<sub>3</sub>OD was prepared and flame-sealed inside melting point capillaries. All solutions and substrates were stored inside a glovebox filled with argon.

## **Materials for oxidative heterocoupling reactions**

THF was purified with a Pure Solv solvent purification system from Innovative Technology, Inc. LiHMDS was purchased from Sigma Aldrich as a white solid and used without further purification. All ketones were purchased from Alfa Aesar or Acros Organics and purified by short-path distillation, recrystallization from *n*-pentane, or column chromatography

prior to use. Molecular iodine was purchased from Acros Organics and used without further purification. Anhydrous *N,N*-dimethylformamide (DMF) was purchased from Acros Organics.

### **General procedure for the determination of lithium enolate aggregation**

All glassware was flame-dried before use. Two portions of LiHMDS (0.304 mmol each) were dissolved in 0.5 mL of 2.0M THF/toluene each in septated vials with magnetic stirrers and cooled to -10 °C. Ketone A and ketone B (0.3 mmol each) were dissolved separately in 0.5 mL 2.0M THF/toluene and added dropwise to one of the vials of LiHMDS. The two solutions were stirred at -10 °C for 45 minutes. The enolate solutions were then cooled to -78 °C, combined via syringe (stirred for 5 minutes), warmed to -10 °C (stirred for 5 minutes), and re-cooled to -78 °C. The solution was transferred to a septated NMR tube containing a sealed insert (0.3M LiCl in CD<sub>3</sub>OD). The sample temperature was maintained at -78 °C until it was placed in the NMR spectrometer (NMR probe temperature was -30 °C). The sample was locked and shimmed (extensively) using the CD<sub>3</sub>OD. A pre-thermal equilibrated <sup>7</sup>Li NMR spectrum was obtained for the sample at -30 °C. The NMR tube was then ejected from the spectrometer, warmed in-hand for 2 minutes, re-cooled to -30 °C inside the spectrometer, and the <sup>7</sup>Li NMR spectrum was recorded again. The peaks were then integrated with the signal corresponding to the A<sub>4</sub> aggregate set to a value of 1. The shift values are reported relative to the signal for LiCl (0.00 ppm). For all equimolar enolate mixtures reported, the lithium aggregates were ensembles of tetramers (A<sub>4</sub> : A<sub>3</sub>B<sub>1</sub> : A<sub>2</sub>B<sub>2</sub> : A<sub>1</sub>B<sub>3</sub> : B<sub>4</sub>) consistent with those reported by Collum *et al.* (*J. Am. Chem. Soc.*, **2008**, *130*, 4859).

### **General procedure for the oxidative heterocoupling of lithium enolates**

All glassware was flame-dried before use. The ketone substrates (0.3 mmol of each) were dissolved together in 1.0 mL of THF in a septated vial with a magnetic stirrer. The vial

was then cooled to  $-10\text{ }^{\circ}\text{C}$ . LiHMDS (0.64 mmol) was dissolved in 1.0 mL of THF and added dropwise to the solution of ketones. The solution was stirred at  $-10\text{ }^{\circ}\text{C}$  for 45 minutes. The enolate solution was placed in a water bath at room temperature (stirred for 5 minutes) and then cooled to  $-78\text{ }^{\circ}\text{C}$ . Molecular iodine (0.3 mmol) was dissolved in 1.0 mL of THF and added to the enolate solution dropwise via syringe with vigorous stirring. The reaction solution was removed from the  $-78\text{ }^{\circ}\text{C}$  bath and allowed to slowly warm to room temperature over 30 minutes. The reaction was quenched with an equal volume of brine, separated, and the aqueous layer was extracted three times with ethyl acetate. The organic layers were combined, rotary evaporated to dryness, and the crude reaction mixture was redissolved in  $\text{CDCl}_3$ . DMF (0.3 mmol) was added. Product yields and ratios (heterocoupled product:homocoupled product) were determined by  $^1\text{H}$  NMR. The heterocoupled products were purified via automated flash chromatography and characterized by  $^1\text{H}$  NMR,  $^{13}\text{C}$  NMR, GC-MS, and LC-HRMS.

### **$^7\text{Li}$ NMR spectra of lithium enolate aggregates**

#### **5-Methoxy-1-indanone (A) with pinacolone (B)**

Procedure 5.2.3.1 was followed.  $^7\text{Li}$  NMR (2.0M THF/toluene, 194 MHz, shifts relative to 0.3M LiCl in  $\text{CD}_3\text{OD}$ ) –  $\delta$  1.18 ( $\text{A}_3\text{B}_1$ ), 1.12 ( $\text{A}_4$ ), 0.79 ( $\text{A}_2\text{B}_2$ ), 0.69 ( $\text{A}_3\text{B}_1$ ), 0.27 ( $\text{A}_1\text{B}_3$ ), 0.24 ( $\text{A}_2\text{B}_2$ ), -0.03 ( $\text{A}_1\text{B}_3$ ), -0.07 ( $\text{B}_4$ ).

#### **5-Bromo-1-indanone (A) and pinacolone (B)**

Procedure 5.2.3.1 was followed.  $^7\text{Li}$  NMR (2.0M THF/toluene, 194 MHz, shifts relative to 0.3M LiCl in  $\text{CD}_3\text{OD}$ ) –  $\delta$  0.99 ( $\text{A}_3\text{B}_1$ ), 0.88 ( $\text{A}_4$ ), 0.66 ( $\text{A}_2\text{B}_2$ ), 0.51 ( $\text{A}_3\text{B}_1$ ), 0.20 ( $\text{A}_1\text{B}_3$ ), 0.12 ( $\text{A}_2\text{B}_2$ ), -0.06 ( $\text{B}_4$ ), -0.09 ( $\text{A}_1\text{B}_3$ ).

### 1-Indanone (**A**) and pinacolone (**B**)

Procedure 5.2.3.1 was followed.  $^7\text{Li}$  NMR (2.0M THF/toluene, 194 MHz, shifts relative to 0.3M LiCl in  $\text{CD}_3\text{OD}$ ) –  $\delta$  1.21 ( $\text{A}_3\text{B}_1$ ), 1.13 ( $\text{A}_4$ ), 0.80 ( $\text{A}_2\text{B}_2$ ), 0.69 ( $\text{A}_3\text{B}_1$ ), 0.28 ( $\text{A}_1\text{B}_3$ ), 0.24 ( $\text{A}_2\text{B}_2$ ), -0.04 ( $\text{A}_1\text{B}_3$ ), -0.07 ( $\text{B}_4$ ).

### 4-Chromanone (**A**) and pinacolone (**B**)

Procedure 5.2.3.1 was followed.  $^7\text{Li}$  NMR (2.0M THF/toluene, 194 MHz, shifts relative to 0.3M LiCl in  $\text{CD}_3\text{OD}$ ) –  $\delta$  0.78 ( $\text{A}_3\text{B}_1$ ), 0.73 ( $\text{A}_4$ ), 0.60 ( $\text{A}_2\text{B}_2$ ), 0.44 ( $\text{A}_3\text{B}_1$ ), 0.20 ( $\text{A}_1\text{B}_3$ ), 0.06 ( $\text{A}_2\text{B}_2$ ), -0.07 ( $\text{B}_4$ ), -0.17 ( $\text{A}_1\text{B}_3$ ).

### 1-Tetralone (**A**) and pinacolone (**B**)

Procedure 5.2.3.1 was followed.  $^7\text{Li}$  NMR (2.0M THF/toluene, 194 MHz, shifts relative to 0.3M LiCl in  $\text{CD}_3\text{OD}$ ) –  $\delta$  0.97 ( $\text{A}_3\text{B}_1$ ), 0.95 ( $\text{A}_4$ ), 0.70 ( $\text{A}_2\text{B}_2$ ), 0.61 ( $\text{A}_3\text{B}_1$ ), 0.27 ( $\text{A}_1\text{B}_3$ ), 0.19 ( $\text{A}_2\text{B}_2$ ), -0.06 ( $\text{A}_1\text{B}_3$ ), -0.10 ( $\text{B}_4$ ).

## Synthesis and spectral data for heterocoupled products

### 2-(3,3-Dimethyl-2-oxobutyl)-5-methoxy-indan-1-one (**12**)

Procedure 5.2.3.2 was followed. Clear, colorless oil. 62% yield.  $^1\text{H}$  NMR ( $\text{CDCl}_3$ , 500 MHz) –  $\delta$  7.68-7.63 (m, 1H), 6.89-6.84 (m, 1H), 6.84-6.81 (m, 1H), 3.84 (s, 3H), 3.38 (dd, 1H,  $J = 7.8$  Hz, 17.7 Hz), 3.16 (dd, 1H,  $J = 3.4$  Hz, 18.3 Hz), 3.01-2.94 (m, 1H), 2.75 (dd, 1H, 9.5 Hz, 18.3 Hz), 2.56 (dd, 1H,  $J = 4.2$  Hz, 17.2 Hz), 1.13 (s, 9H).  $^{13}\text{C}$  NMR ( $\text{CDCl}_3$ , 125 MHz) –  $\delta$  214.2, 206.3, 165.3, 156.5, 129.8, 125.4, 115.3, 109.5, 55.6, 43.9, 43.0, 38.4, 33.6, 26.4. MS [ $m/z$  (rel int)] 260 ( $\text{M}^+$ , 9), 203 (22), 175 (100), 161 (10), 147 (36), 131 (9), 115 (13), 103 (11), 91 (12), 77 (9), 57 (31). LC-HRMS calcd. for  $\text{C}_{16}\text{H}_{21}\text{O}_3$  [ $\text{M}+\text{H}$ ] 261.1485, found 261.1480.

### 5-Bromo-2-(3,3-dimethyl-2-oxobutyl)-indan-1-one (**13**)

Procedure 5.2.3.2 was followed. Light yellow oil. 58% yield.  $^1\text{H}$  NMR ( $\text{CDCl}_3$ , 500 MHz) –  $\delta$  7.63-7.57 (m, 2H), 7.51-7.46 (m, 1H), 3.39 (dd, 1H,  $J = 8.0$  Hz, 17.3 Hz), 3.18 (dd, 1H,  $J = 2.7$  Hz, 17.7 Hz), 2.97-2.92 (m, 1H), 2.88 (dd, 1H,  $J = 8.3$  Hz, 18.0 Hz), 2.64 (dd, 1H,  $J = 4.4$  Hz, 17.5 Hz) 1.14 (s, 9H).  $^{13}\text{C}$  NMR ( $\text{CDCl}_3$ , 125 MHz) –  $\delta$  213.9, 206.8, 155.0, 135.5, 131.0, 130.0, 129.8, 125.0, 43.9, 43.0, 38.0, 33.0, 26.5. MS [ $m/z$  (rel int)] 308/310 ( $\text{M}^+$ , 9), 251/253 (29), 223/225 (76), 145 (22), 115 (88), 89 (21), 57 (100). LC-HRMS calcd. for  $\text{C}_{15}\text{H}_{18}\text{BrO}_2$  [ $\text{M}+\text{H}$ ] 309.0485, found 309.0462.

### 2-(3,3-Dimethyl-2-oxobutyl)-indan-1-one (**14**)

Procedure 5.2.3.2 was followed. Clear, colorless oil. 62% yield.  $^1\text{H}$  NMR ( $\text{CDCl}_3$ , 500 MHz) –  $\delta$  7.80-7.75 (m, 1H), 7.62-7.56 (m, 1H), 7.47-7.43 (m, 1H), 7.41-7.35 (m, 1H), 3.46 (dd, 1H,  $J = 8.0$  Hz, 17.2 Hz), 3.22 (dd, 1H,  $J = 3.4$  Hz, 18.5 Hz), 3.05-2.98 (m, 1H), 2.86 (dd, 1H,  $J = 8.8$  Hz, 18.5 Hz), 2.67 (dd, 1H,  $J = 4.6$  Hz, 17.6 Hz), 1.18 (s, 9H).  $^{13}\text{C}$  NMR ( $\text{CDCl}_3$ , 125 MHz) –  $\delta$  214.1, 208.2, 153.5, 136.6, 134.7, 127.4, 126.5, 123.8, 44.0, 43.0, 38.2, 33.5, 26.5. MS [ $m/z$  (rel int)] 230 ( $\text{M}^+$ , 8), 173 (16), 145 (100), 131 (11), 115 (67), 91 (21), 57 (27). LC-HRMS calcd. for  $\text{C}_{15}\text{H}_{19}\text{O}_2$  [ $\text{M}+\text{H}$ ] 231.1380, found 231.1383.

### 3-(3,3-Dimethyl-2-oxobutyl)-chroman-4-one (**15**)

Procedure 5.2.3.2 was followed. Off-white solid. 46% yield.  $^1\text{H}$  NMR ( $\text{CDCl}_3$ , 500 MHz) –  $\delta$  7.88-7.83 (m, 1H), 7.49-7.42 (m, 1H), 7.03-6.97 (m, 1H), 6.97-6.92 (m, 1H), 4.48 (dd, 1H,  $J = 5.2$  Hz, 11.1 Hz), 4.20 (t, 1H,  $J = 11.3$  Hz), 3.42-3.35 (m, 1H), 3.10 (dd, 1H,  $J = 4.4$  Hz, 18.4 Hz), 2.57 (dd, 1H,  $J = 8.0$  Hz, 18.1 Hz), 1.18 (s, 9H).  $^{13}\text{C}$  NMR ( $\text{CDCl}_3$ , 125 MHz) –  $\delta$  212.9, 193.7, 161.8, 135.9, 127.3, 121.4, 120.7, 117.8, 70.3, 44.3, 41.7, 32.6, 26.5. MS [ $m/z$  (rel

int)] 246 ( $M^+$ , 3), 189 (100), 171 (9), 161 (24), 147 (40), 133 (6), 121 (16), 92 (14), 57 (36). LC-HRMS calcd. for  $C_{15}H_{19}O_3$  [ $M+H$ ] 247.1329, found 247.1330.

### 2-(3,3-Dimethyl-2-oxobutyl)-tetral-1-one (**16**)

Procedure 5.2.3.2 was followed. Light yellow oil. 47% yield.  $^1H$  NMR ( $CDCl_3$ , 500 MHz) –  $\delta$  8.01-7.96 (m, 1H), 7.47-7.40 (m, 1H), 7.30-7.25 (m, 1H), 7.23-7.19 (m, 1H), 3.26 (dd, 1H,  $J = 5.1$  Hz, 18.0 Hz), 3.17-3.06 (m, 2H), 2.96-2.89 (m, 1H), 2.56 (dd, 1H,  $J = 6.8$  Hz, 18.1 Hz), 2.15-2.08 (m, 1H), 1.89 (dddd, 1H,  $J = 4.4$  Hz, 12.9 Hz, 13.7 Hz, 13.1 Hz) 1.19 (s, 9H).  $^{13}C$  NMR ( $CDCl_3$ , 125 MHz) –  $\delta$  214.2, 199.3, 144.1, 133.2, 132.4, 128.7, 127.4, 126.6, 44.2, 43.8, 37.4, 29.4, 26.5. MS [ $m/z$  (rel int)] 244 ( $M^+$ , 1) 187 (100), 169 (16), 159 (5), 145 (11), 131 (27), 115 (11), 91 (16), 57 (21). LC-HRMS calcd. for  $C_{16}H_{21}O_2$  [ $M+H$ ] 245.1536, found 245.1519.

### Impact of heteroaggregation on the oxidative heterocoupling of lithium enolates

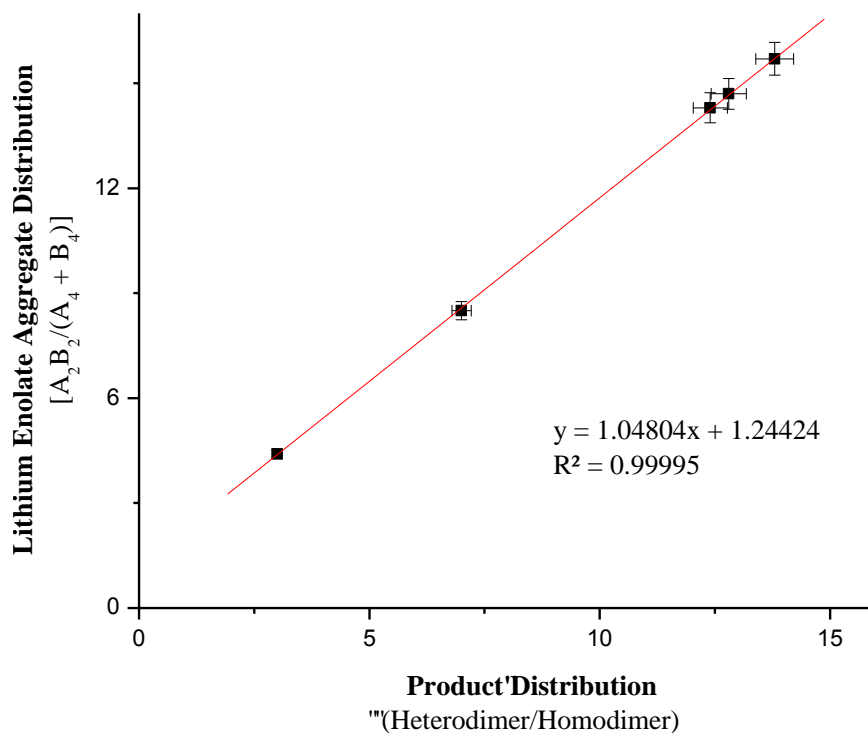

**$^7\text{Li}$  NMR spectra of lithium enolate aggregates**



5MeOInda-Pina-0.15M Each-042011  
Repeat -30C

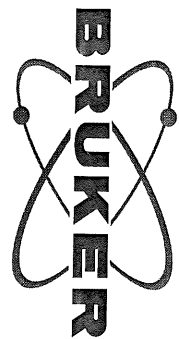

Current Data Parameters  
NAME 7Li\_BB05  
EXPNO 60  
PROCNO 1

F2 - Acquisition Parameters  
Date\_ 20110420  
Time 11.26  
INSTRUM spect  
PROBHD 5 mm BBO BB-1H  
PULPROG zg30  
TD 65536  
SOLVENT MeOD  
NS 8  
DS 0  
SWH 10000.000 Hz  
FIDRES 0.152588 Hz  
AQ 3.2769001 sec  
RG 4597.6  
DW 50.000 usec  
DE 7.00 usec  
TE 241.2 K  
D1 1.00000000 sec  
TD0 1

==== CHANNEL f1 =====  
NUC1 7Li  
P1 9.10 usec  
PL1 -2.00 dB  
SF01 194.3695080 MHz  
F2 - Processing parameters  
SI 32768  
SF 194.3694464 MHz  
WDW EM  
SSB 0  
LB 0.30 Hz  
GB 0  
PC 1.40

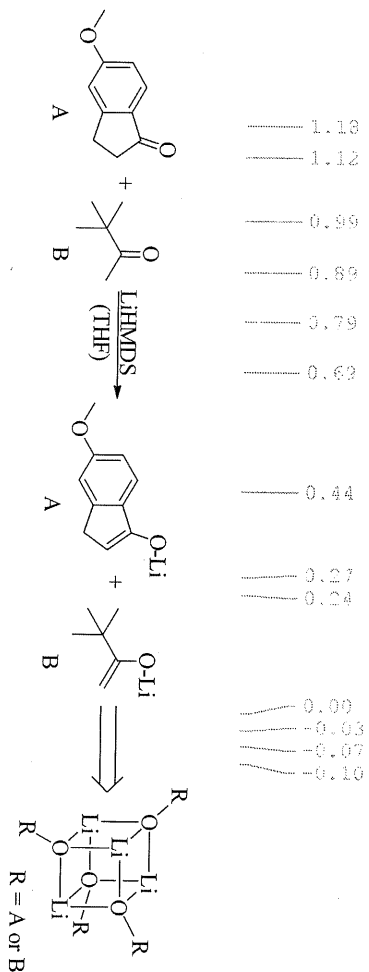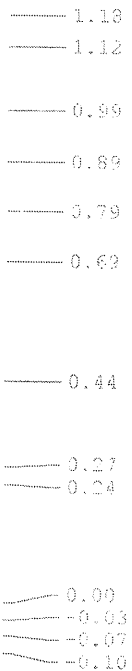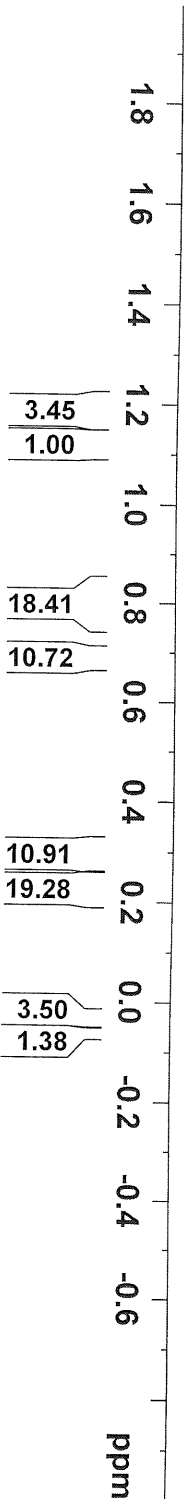

Br-Inda-Pina-0.15M Each-042011  
Repeat-warming

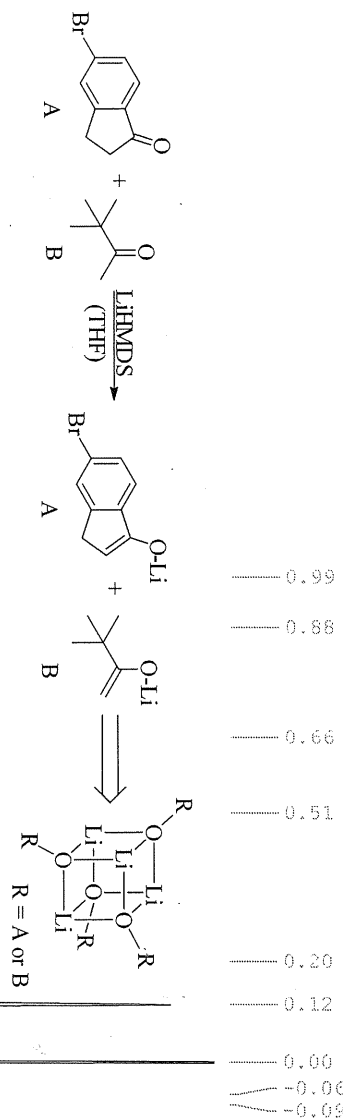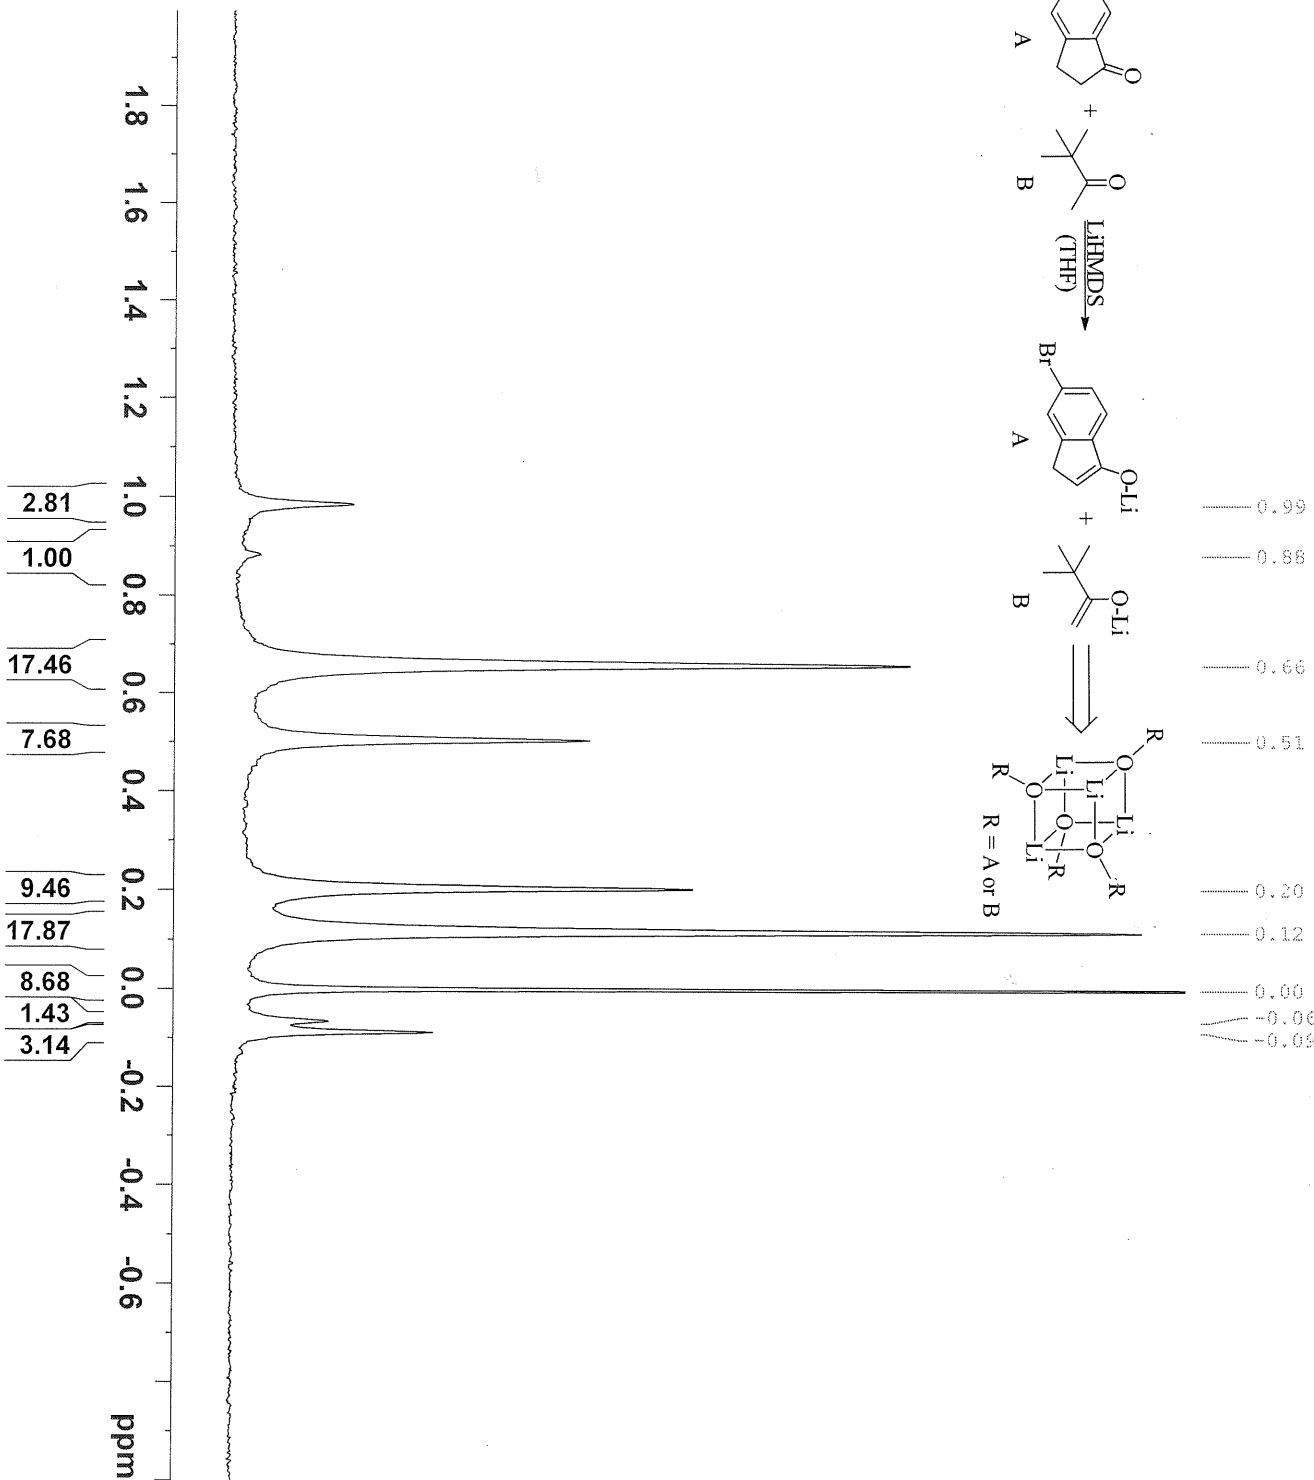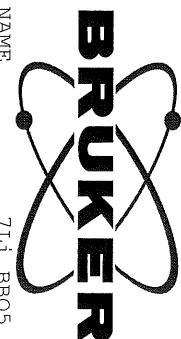

```

NAME          7Li_BB05
EXPNO         59
PROCNO        1
Date_         20110420
Time_         11.17
INSTRUM       spect
PROBHD        5 mm BBO BB-1H
PULPROG       zg30
TD            65536
SOLVENT       MeOD
NS            8
DS            0
SWH           10000.000 Hz
FIDRES        0.152588 Hz
AQ            3.2769001 sec
RG            4597.6
DE            50.000 usec
TE            241.1 K
D1            1.00000000 sec
TD0           1
  
```

```

===== CHANNEL f1 =====
NUC1          7Li
P1            9.10 usec
PL1          -2.00 dB
SFO1         194.3695080 MHz
SF           32768
SI           194.3694464 MHz
WDW          EM
SSB          0
LB           0.30 Hz
GB           0
PC           1.40
  
```

Indapina-Enolates-0.15M Each-062310  
 LiCl in MeOH-d4  
 Repeat/Warming-2

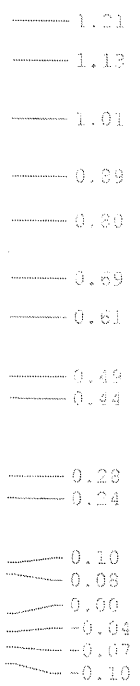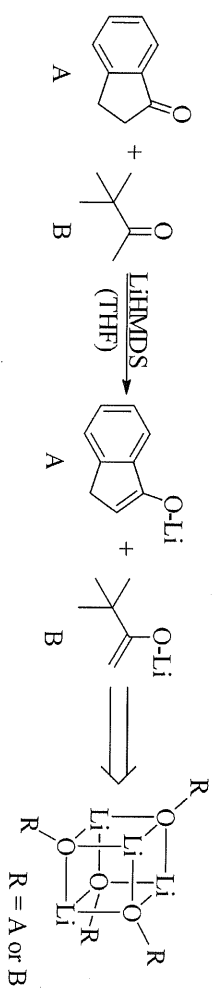

Current Data Parameters  
 NAME 7Li\_BB05  
 EXPNO 25  
 PROCNO 1

F2 - Acquisition Parameters  
 Date\_ 20100623  
 Time 11.33  
 INSTRUM spect  
 PROBHD BB-1H  
 PULPROG zg30  
 TD 65536  
 SOLVENT MeOD  
 NS 8  
 DS 0  
 SWH 10000.000 Hz  
 FIDRES 0.152588 Hz  
 AQ 3.2769001 sec  
 RG 5160.6  
 DW 50.000 usec  
 DE 7.00 usec  
 TE 239.6 K  
 D1 1.00000000 sec  
 TD0 1

==== CHANNEL f1 =====  
 NUCL 7Li  
 P1 9.10 usec  
 PL1 -2.00 dB  
 SF01 194.3695080 MHz

F2 - Processing parameters  
 SI 32768  
 SF 194.3694465 MHz  
 WDM EM  
 SSB 0  
 LB 0.30 Hz  
 GB 0  
 PC 1.40

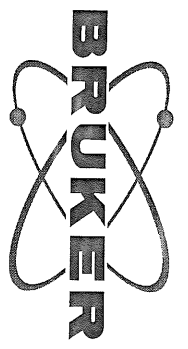

4-Chroma-Pina-Enolates-0.15M Each-063010  
 LiCl in MeOH-d4  
 Repeat/Warming

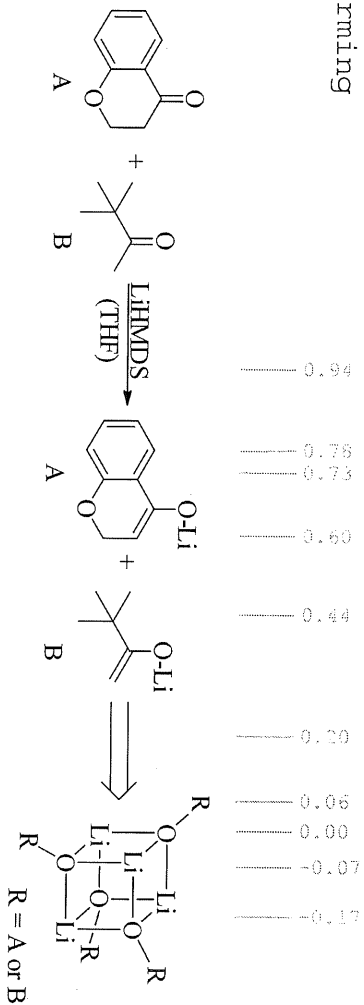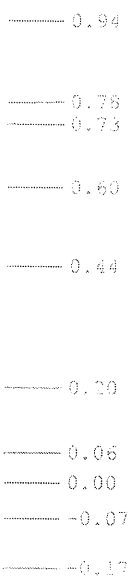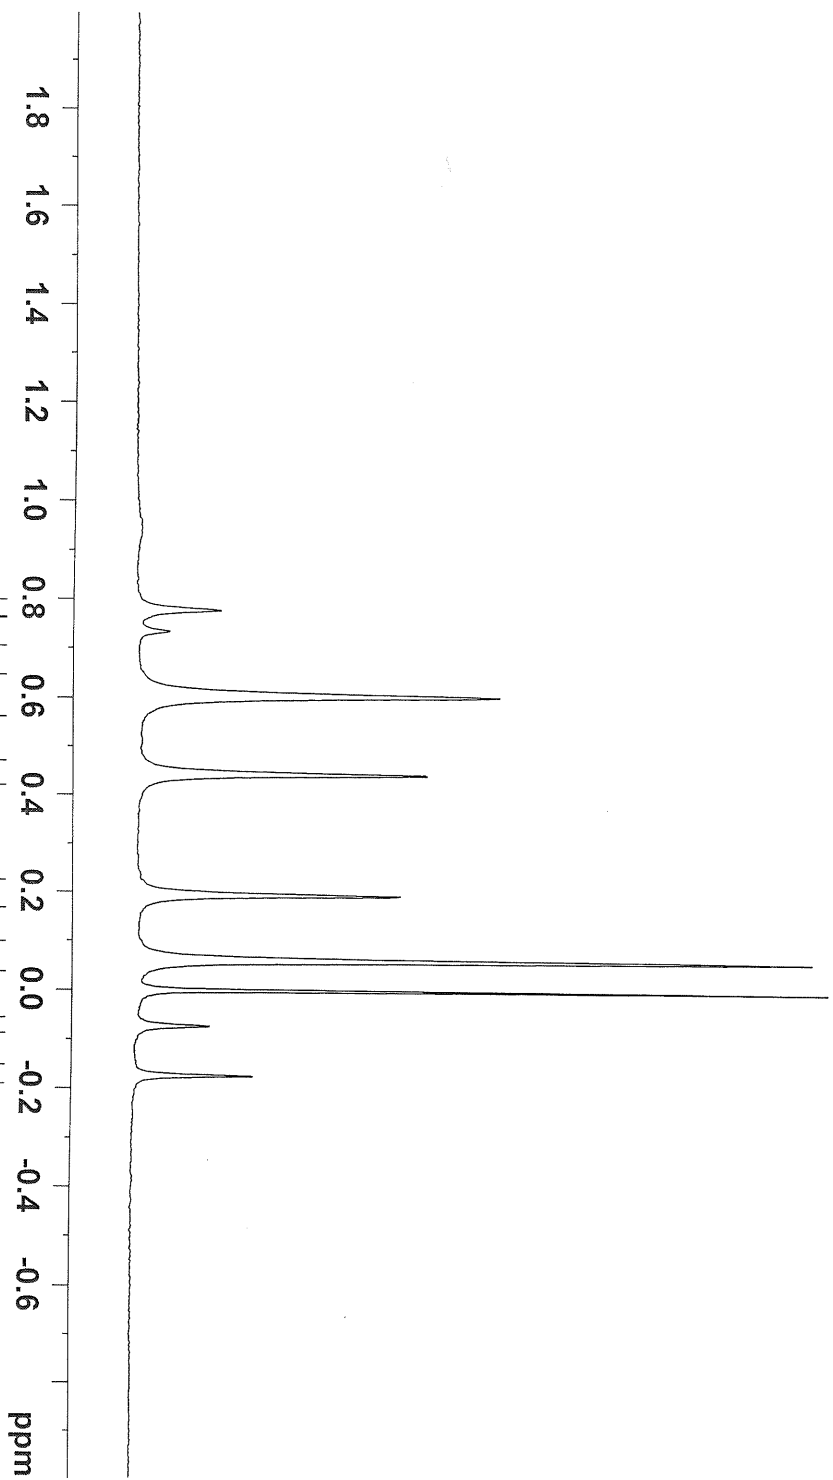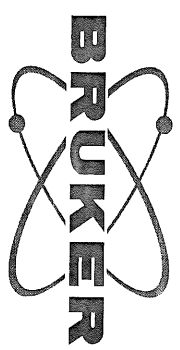

Current Data Parameters  
 NAME 7Li\_BB05  
 EXPNO 31  
 PROCNO 1

F2 - Acquisition Parameters  
 Date\_ 20100630  
 Time 10.20  
 INSTRUM spect  
 PROBHD 5 mm BBO BB-1H  
 PULPROG zg30  
 TD 65536  
 SOLVENT MeOD  
 NS 8  
 DS 0  
 SWH 10000.000 Hz  
 FIDRES 0.152588 Hz  
 AQ 3.2769001 sec  
 RG 5160.6  
 DW 50.000 usec  
 DE 7.00 usec  
 TE 241.2 K  
 D1 1.00000000 sec  
 TD0 1

==== CHANNEL f1 =====  
 NUC1 7Li  
 P1 9.10 usec  
 PL1 -2.00 dB  
 SFO1 194.3695080 MHz

F2 - Processing parameters  
 SI 32768  
 SF 194.3694468 MHz  
 WDW EM  
 SSB 0  
 LB 0.30 Hz  
 GB 0  
 PC 1.40

aTet-Pina-0.15M Each-040311  
 repeat-warming

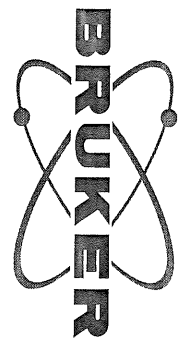

Current Data Parameters  
 NAME 7Li\_BB05  
 EXPNO 53  
 PROCNO 1

F2 - Acquisition Parameters  
 Date\_ 20110403  
 Time 18.05  
 INSTRUM spect  
 PROBHD 5 mm BBO BB-1H  
 PULPROG zg30  
 TD 65536  
 SOLVENT CDCl3  
 NS 8  
 DS 0  
 SWH 10000.000 Hz  
 FIDRES 0.152588 Hz  
 AQ 3.2769001 sec  
 RG 4597.6  
 DW 50.000 usec  
 DE 7.00 usec  
 TE 241.2 K  
 D1 1.00000000 sec  
 TD0 1

==== CHANNEL f1 =====  
 NUC1 7Li  
 P1 9.10 usec  
 PL1 -2.00 dB  
 SFO1 194.3695080 MHz

F2 - Processing parameters  
 SI 32768  
 SF 194.3702125 MHz  
 WDW EM  
 SSB 0  
 LB 0.30 Hz  
 GB 0  
 PC 1.40

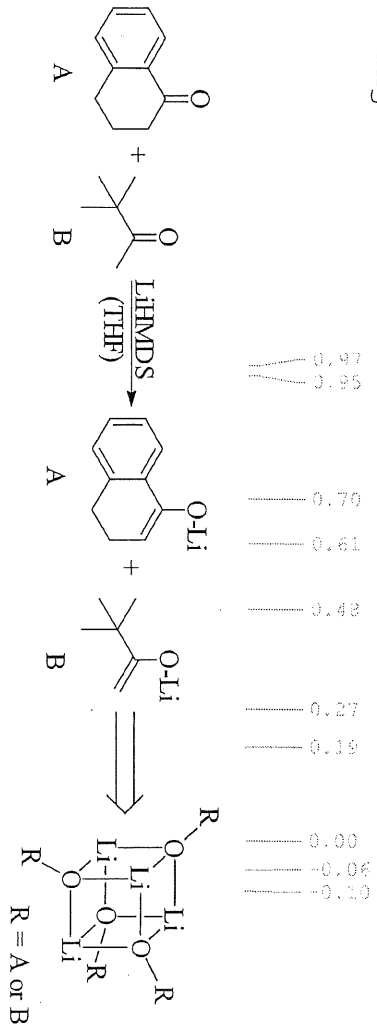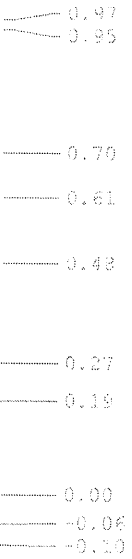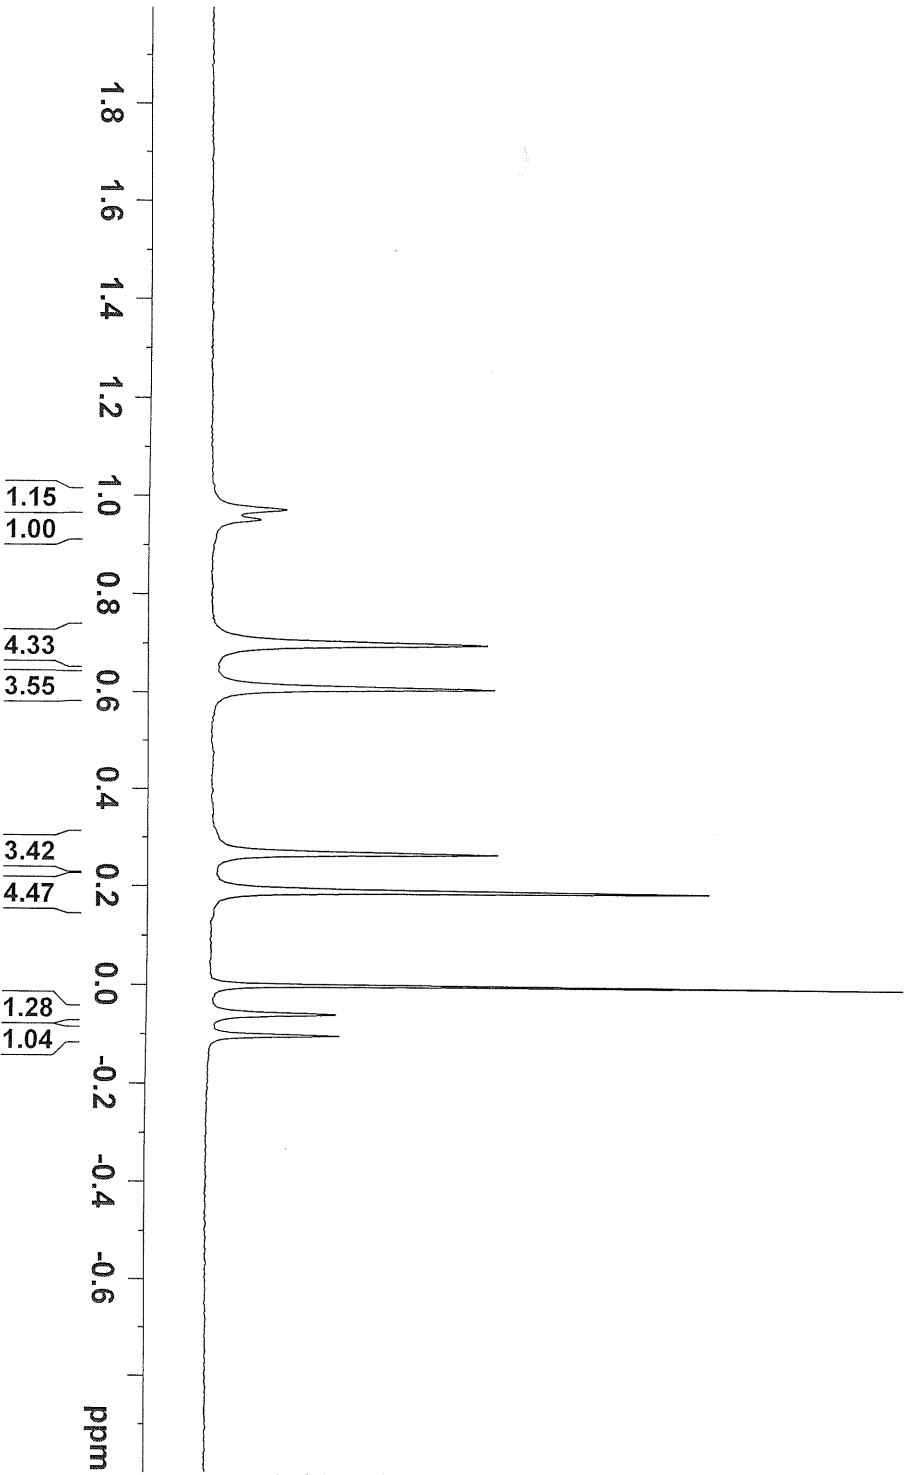

**$^1\text{H}$  NMR and  $^{13}\text{C}$  NMR spectra of heterocoupled products**

7.6631  
7.6461  
7.2397  
6.8763  
6.8720  
6.8593  
6.8551  
6.8317  
3.9810  
3.8791  
3.8577  
3.8389  
3.7990  
3.7838  
3.7662  
3.6919  
3.4799  
3.3993  
3.3835  
3.3648  
3.3489  
3.1859  
3.1794  
3.1491  
3.1427  
3.0544  
3.0421  
2.9991  
2.9904  
2.9834  
2.9809  
2.9743  
2.9652  
2.9582  
2.9562  
2.9496  
2.8174  
2.7772  
2.7588  
2.7405  
2.7220  
2.6466  
2.6347  
2.6228  
2.5894  
2.5807  
2.5549  
2.5462  
1.7496  
1.3816  
1.3012  
1.2588  
1.2174  
1.2032  
1.1740  
1.1338  
1.0938  
1.0691  
1.0467  
1.0252  
1.0050  
0.9490  
0.9001  
0.8168  
0.7777  
0.0379

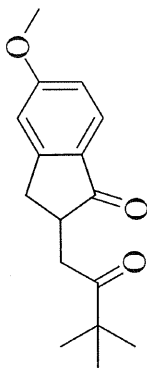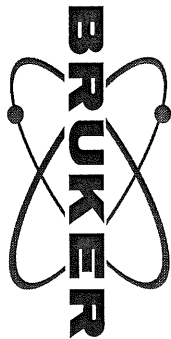

Current Data Parameters  
NAME 5-MeOIndapina-1HfMS-12-041211  
EXPNO 2  
PROCNO 1

F2 - Acquisition Parameters  
Date\_ 20110413  
Time 7.55  
INSTRUM spect  
PROBHD 5 mm BBO BB-1H  
PULPROG zg30  
TD 32768  
SOLVENT CDCl3  
NS 4  
DS 0  
SWH 10000.000 Hz  
FIDRES 0.305176 Hz  
AQ 1.6385000 sec  
RG 101.6  
DW 50.000 usec  
DE 6.50 usec  
TE 296.1 K  
TL 1.00000000 sec  
TD0 1

==== CHANNEL f1 =====  
NUC1 1H  
P1 14.00 usec  
PL 1.00 dB  
SFO1 500.1345012 MHz  
F2 - Processing parameters  
SI 32768  
SF 500.1300232 MHz  
WDW EM  
SSB 0  
LB 0.30 Hz  
GB 0  
PC 1.00

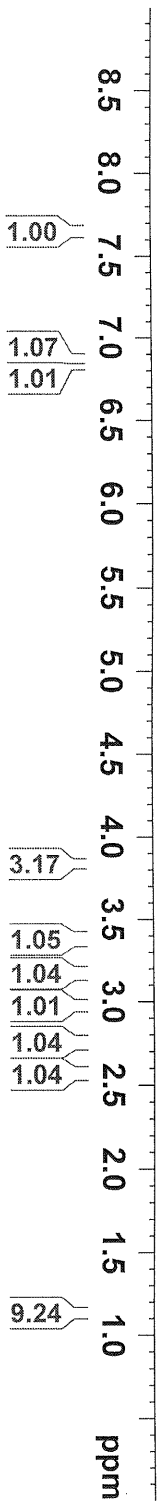

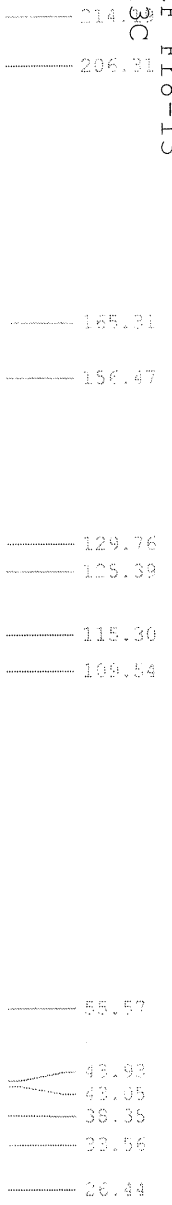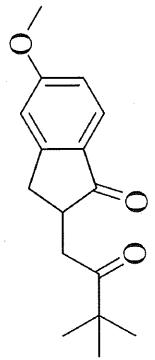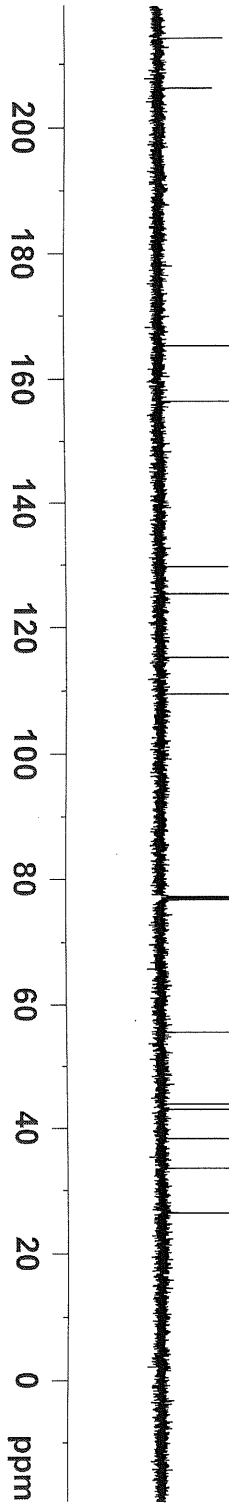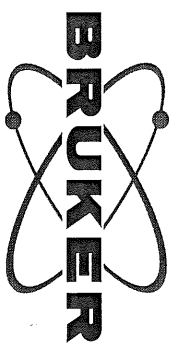

Current Data Parameters  
NAME 5-MeOindapina-J1HMDS-I2-041211  
EXPNO 3  
PROCNO 1

F2 - Acquisition Parameters  
Date\_ 20100413  
Time 8.00  
INSTRUM spect  
PROBHD 5 mm BBO BB-1H  
PULPROG zgpgc30  
TD 65536  
SOLVENT CDCl3  
NS 34  
DS 4  
SWH 30030.029 Hz  
FIDRES 0.458222 Hz  
AQ 1.0912410 sec  
RG 2048  
DW 16.650 usec  
DE 7.00 usec  
TE 296.6 K  
D1 1.00000000 sec  
d11 0.03000009 sec  
TD0 1

===== CHANNEL f1 =====  
NUC1 13C  
P1 8.60 usec  
PL1 1.00 dB  
SFO1 125.7703640 MHz

===== CHANNEL f2 =====  
CPDPRG2 waltz16  
NUC2 1H  
PCPD2 100.00 usec  
PL2 1.00 dB  
PL12 17.50 dB  
SFO2 500.1322150 MHz  
F2 - Processing parameters  
SI 32768  
SF 125.7577980 MHz  
WDW EM  
SSB 0  
LB 1.00 Hz  
GB 0  
PC 1.40



Crude + DMF + 1:1

7.5000  
7.4844  
7.4688  
7.4532  
7.4376  
7.4220  
7.4064  
7.3908  
7.3752  
7.3596  
7.3440  
7.3284  
7.3128  
7.2972  
7.2816  
7.2660  
7.2504  
7.2348  
7.2192  
7.2036  
7.1880  
7.1724  
7.1568  
7.1412  
7.1256  
7.1100  
7.0944  
7.0788  
7.0632  
7.0476  
7.0320  
7.0164  
6.9908  
6.9752  
6.9596  
6.9440  
6.9284  
6.9128  
6.8972  
6.8816  
6.8660  
6.8504  
6.8348  
6.8192  
6.8036  
6.7880  
6.7724  
6.7568  
6.7412  
6.7256  
6.7100  
6.6944  
6.6788  
6.6632  
6.6476  
6.6320  
6.6164  
6.6008  
6.5852  
6.5696  
6.5540  
6.5384  
6.5228  
6.5072  
6.4916  
6.4760  
6.4604  
6.4448  
6.4292  
6.4136  
6.3980  
6.3824  
6.3668  
6.3512  
6.3356  
6.3200  
6.3044  
6.2888  
6.2732  
6.2576  
6.2420  
6.2264  
6.2108  
6.1952  
6.1796  
6.1640  
6.1484  
6.1328  
6.1172  
6.1016  
6.0860  
6.0704  
6.0548  
6.0392  
6.0236  
6.0080  
5.9924  
5.9768  
5.9612  
5.9456  
5.9300  
5.9144  
5.8988  
5.8832  
5.8676  
5.8520  
5.8364  
5.8208  
5.8052  
5.7896  
5.7740  
5.7584  
5.7428  
5.7272  
5.7116  
5.6960  
5.6804  
5.6648  
5.6492  
5.6336  
5.6180  
5.6024  
5.5868  
5.5712  
5.5556  
5.5400  
5.5244  
5.5088  
5.4932  
5.4776  
5.4620  
5.4464  
5.4308  
5.4152  
5.3996  
5.3840  
5.3684  
5.3528  
5.3372  
5.3216  
5.3060  
5.2904  
5.2748  
5.2592  
5.2436  
5.2280  
5.2124  
5.1968  
5.1812  
5.1656  
5.1500  
5.1344  
5.1188  
5.1032  
5.0876  
5.0720  
5.0564  
5.0408  
5.0252  
5.0096  
4.9940  
4.9784  
4.9628  
4.9472  
4.9316  
4.9160  
4.9004  
4.8848  
4.8692  
4.8536  
4.8380  
4.8224  
4.8068  
4.7912  
4.7756  
4.7600  
4.7444  
4.7288  
4.7132  
4.6976  
4.6820  
4.6664  
4.6508  
4.6352  
4.6196  
4.6040  
4.5884  
4.5728  
4.5572  
4.5416  
4.5260  
4.5104  
4.4948  
4.4792  
4.4636  
4.4480  
4.4324  
4.4168  
4.4012  
4.3856  
4.3700  
4.3544  
4.3388  
4.3232  
4.3076  
4.2920  
4.2764  
4.2608  
4.2452  
4.2296  
4.2140  
4.1984  
4.1828  
4.1672  
4.1516  
4.1360  
4.1204  
4.1048  
4.0892  
4.0736  
4.0580  
4.0424  
4.0268  
4.0112  
4.0000

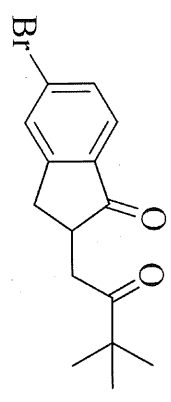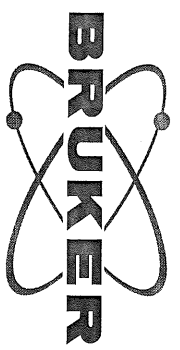

Current Data Parameters  
 NAME 5Br-Indapina-14HMS-12-042211  
 EXPNO 2  
 PROCNO 1

F2 - Acquisition Parameters  
 Date\_ 20110422  
 Time 13.14  
 INSTRUM spect  
 PROBHD 5 mm BBO BB-1H  
 PULPROG zg30  
 TD 32768  
 SOLVENT CDCl3  
 NS 4  
 DS 0  
 SFE 10000.000 Hz  
 FIDRES 0.305176 Hz  
 AQ 1.6385000 sec  
 RG 406.4  
 DW 50.000 usec  
 DE 6.50 usec  
 TE 295.8 K  
 D1 1.00000000 sec  
 TDO 1

===== CHANNEL f1 =====  
 NUCL1 1H  
 P1 14.00 usec  
 PL1 1.00 dB  
 SFO1 500.1345012 MHz  
 F2 - Processing parameters  
 SI 32768  
 SF 500.1300232 MHz  
 WDW EM  
 SSB 0  
 LB 0.30 Hz  
 GB 0  
 PC 1.00

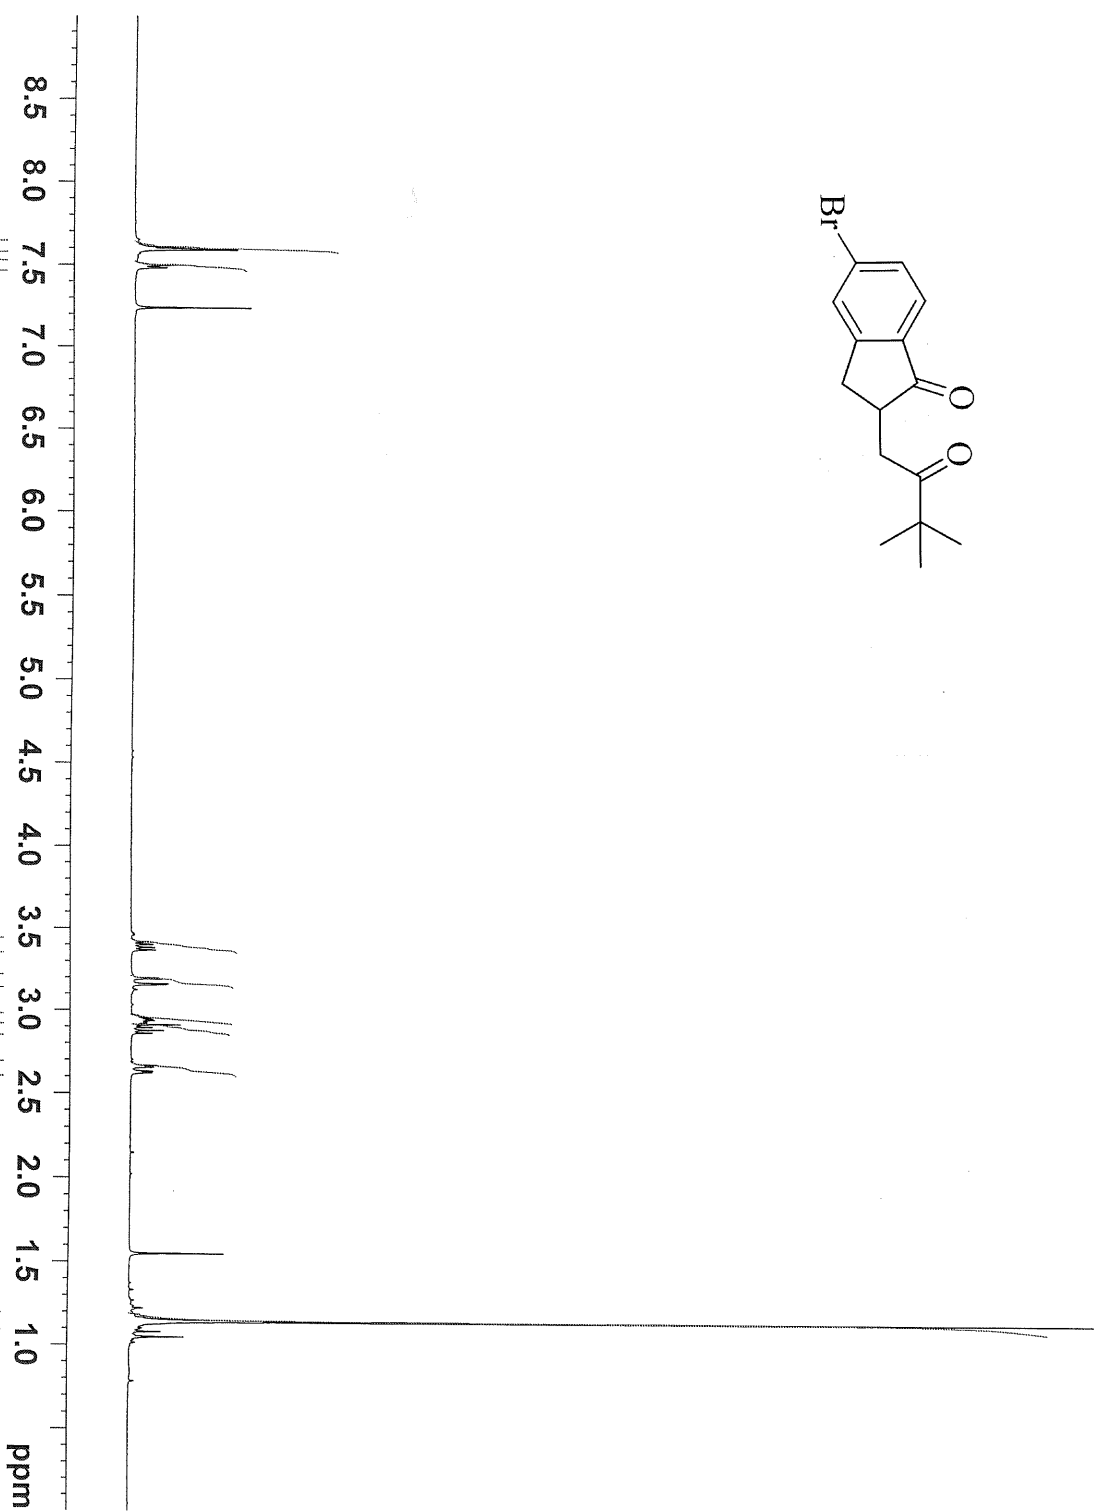

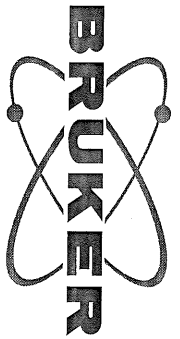

TandemEnolization (Inv)  
 CH-F211  
 13C  
 206

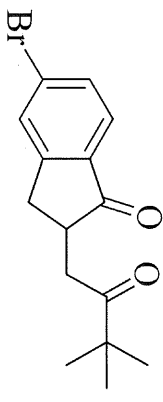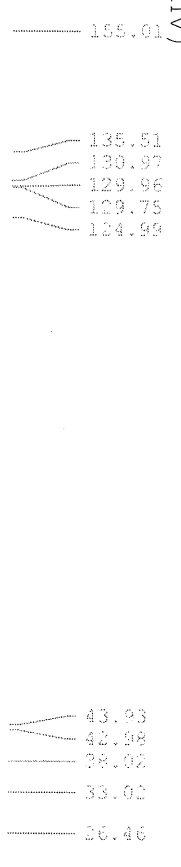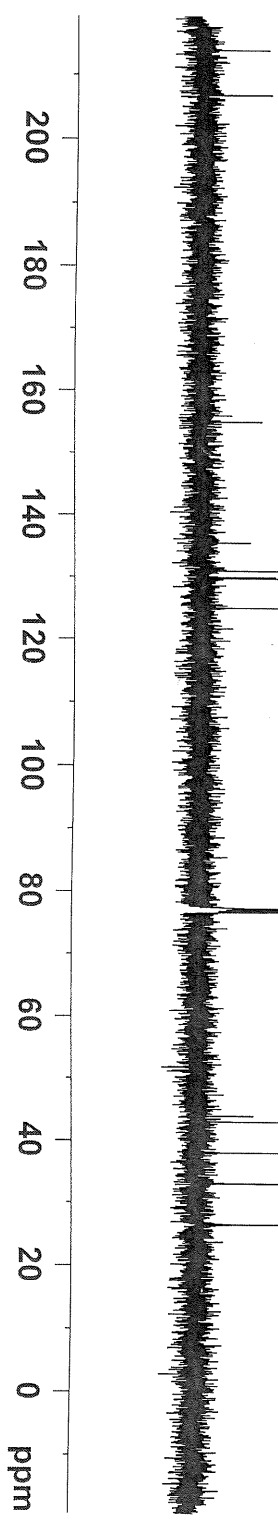

Current Data Parameters  
 NAME 5Br-Indapina-LiHMDS-I2-042211  
 EXPMO 3  
 PROCNO 1

F2 - Acquisition Parameters  
 Date\_ 20110422  
 Time 13.20  
 INSTRUM spect  
 PROHD 5 mm BBO BB-1H  
 PULPROG zgpg30  
 TD 65536  
 SOLVENT CDCl3  
 NS 210  
 DS 4  
 SWH 30030.029 Hz  
 FIDRES 0.458222 Hz  
 AQ 1.0912410 sec  
 RG 2048  
 DW 16.650 usec  
 DE 7.00 usec  
 TE 297.2 K  
 D1 1.0000000 sec  
 d11 0.0300000 sec  
 TD0 1

==== CHANNEL F1 =====  
 NUC1 13C  
 P1 8.60 usec  
 PL1 1.00 dB  
 SFO1 125.7703640 MHz

==== CHANNEL F2 =====  
 CPDPRG2 waltz16  
 NUC2 1H  
 PCPD2 100.00 usec  
 PL2 1.00 dB  
 PL3 17.50 dB  
 SFO2 500.1322150 MHz

F2 - Processing parameters  
 SI 32768  
 SF 125.7577921 MHz  
 WDW EM  
 SSB 0  
 LB 1.00 Hz  
 GB 0  
 PC 1.40

CombiFlash2 - Fr12-13

- 7.7845
- 7.7691
- 7.6064
- 7.5914
- 7.5766
- 7.4993
- 7.4839
- 7.4572
- 7.4418
- 7.3963
- 7.3813
- 7.3666
- 7.2658
- 7.0541

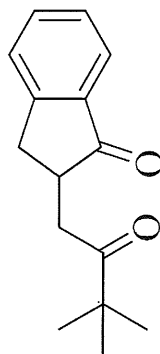

- 5.1827
- 4.3448
- 3.4911
- 3.4751
- 3.4568
- 3.4408
- 3.2437
- 3.2373
- 3.2070
- 3.2006
- 3.1740
- 3.1617
- 3.1504
- 3.0441
- 3.0370
- 3.0281
- 3.0194
- 3.0119
- 3.0037
- 2.9952
- 2.8869
- 2.8694
- 2.8502
- 2.8327
- 2.7197
- 2.7079
- 2.6945
- 2.6852
- 2.6598
- 2.6508
- 1.5674
- 1.5281
- 1.4269
- 1.3476
- 1.3048
- 1.2597
- 1.2469
- 1.2333
- 1.2264
- 1.1627
- 1.1402

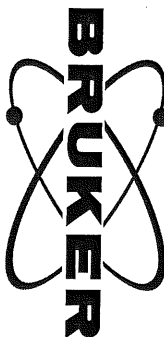

Current Data Parameters  
 NAME Linda-Pina-LDA-CTAN-070209  
 EXPNO 2  
 PROCNO 1

F2 - Acquisition Parameters  
 Date\_ 20090702  
 Time 14.09  
 INSTRUM spect  
 PROHD 5 mm TXI 1H/D-  
 PULPROG zg30  
 TD 32768  
 SOLVENT CDCl3  
 NS 6  
 DS 0  
 SWH 7002.801 Hz  
 FIDRES 0.213709 Hz  
 AQ 2.3397565 sec  
 RG 406.4  
 DW 71.400 usec  
 DE 6.00 usec  
 TE 295.8 K  
 D1 1.00000000 sec  
 TDO 1

==== CHANNEL f1 =====  
 NUCL1 1H  
 P1 7.25 usec  
 PL1 1.00 dB  
 SFO1 500.133509 MHz  
 F2 - Processing parameters  
 SI 32768  
 SF 500.1300102 MHz  
 WDW EM  
 SSB 0  
 LB 0.30 Hz  
 GB 0  
 PC 1.00

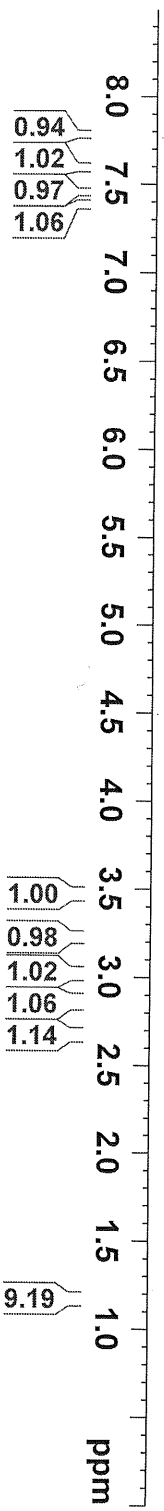

CombiFlash-Fr8-13C NMR

- 214.07
- 208.22
- 153.50
- 136.59
- 134.69
- 127.36
- 126.49
- 123.82
- 43.96
- 42.99
- 38.18
- 33.47
- 26.49

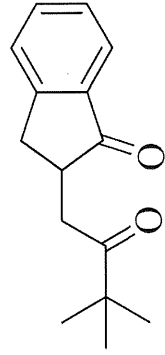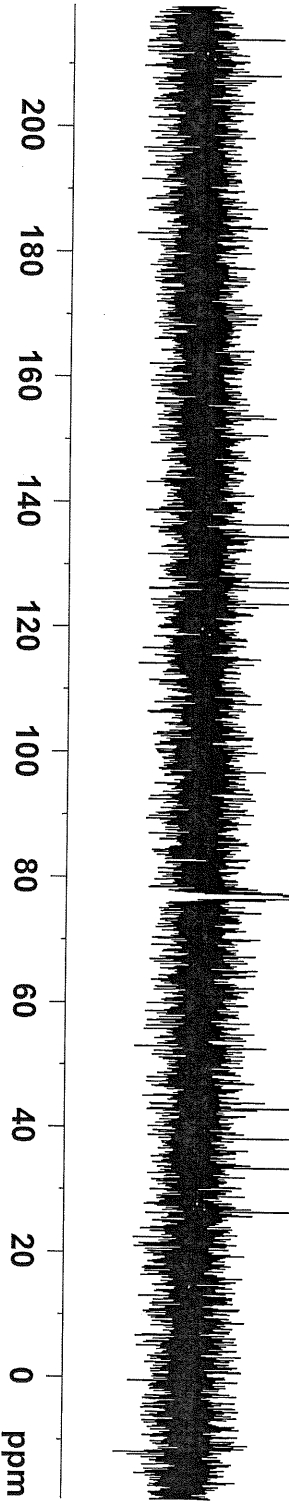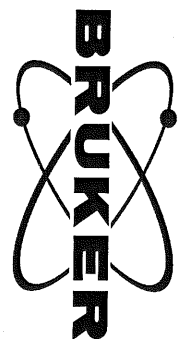

Current Data Parameters  
 NAME Inda-Pina-IDA-CTAN-061809-2  
 EXPNO 3  
 PROCNO 1

F2 - Acquisition Parameters  
 Date\_ 20090622  
 Time 10.27  
 INSTRUM spect  
 PROBRD 5 mm BBO BB-1H  
 PULPROG zgpg30  
 TD 65536  
 SOLVENT CDCl3  
 NS 705  
 DS 4  
 SWH 30030.029 Hz  
 FIDRES 0.458222 Hz  
 AQ 1.0912410 sec  
 RG 4096  
 DW 16.650 usec  
 DE 7.00 usec  
 TE 296.9 K  
 D1 1.00000000 sec  
 d11 0.03000000 sec  
 TDO 1

==== CHANNEL f1 =====  
 NUC1 13C  
 P1 8.60 usec  
 PL1 1.00 dB  
 SFO1 125.7703640 MHz

==== CHANNEL f2 =====  
 CPDPRG2 waltz16  
 NUC2 1H  
 PCPD2 100.00 usec  
 PL2 1.00 dB  
 PL12 17.50 dB  
 SFO2 500.1322150 MHz

F2 - Processing parameters  
 SI 32768  
 SF 125.7577923 MHz  
 WDW EM  
 SSB 0  
 LB 1.00 Hz  
 GB 0  
 PC 1.40

[4 - CP]

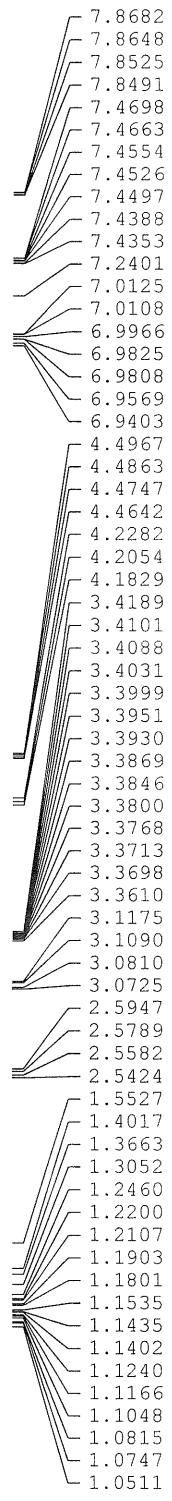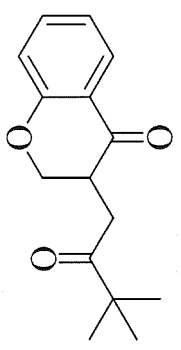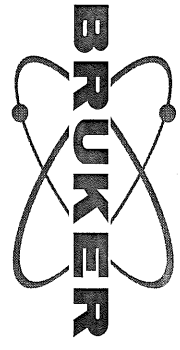

Current Data Parameters  
 NAME Indapina-LiHMDS-12-041411  
 EXPNO 3  
 PROCNO 1

F2 - Acquisition Parameters  
 Date\_ 20110418  
 Time 11.58  
 INSTRUM spect  
 PROBRD 5 mm BBO BB-1H  
 PULPROG zg30  
 TD 32768  
 SOLVENT CDCl3  
 NS 4  
 DS 0  
 SWH 10000.000 Hz  
 FIDRES 0.305176 Hz  
 AQ 1.6385000 sec  
 RG 322.5  
 DW 50.000 usec  
 DE 6.50 usec  
 TE 296.6 K  
 D1 1.00000000 sec  
 TD0 1

==== CHANNEL f1 =====  
 NUC1 1H  
 P1 14.00 usec  
 PL1 1.00 dB  
 SFO1 500.1345012 MHz  
 F2 - Processing parameters  
 SI 32768  
 SF 500.1300232 MHz  
 WDM EM  
 SSB 0  
 LB 0.30 Hz  
 GB 0  
 PC 1.00

[4-CP]

13C

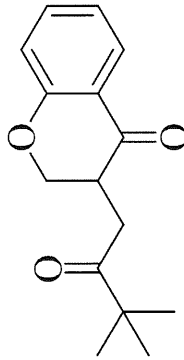

212.33

193.56

161.78

135.89

127.31

121.40

120.86

117.82

70.32

44.28

41.68

32.61

26.49

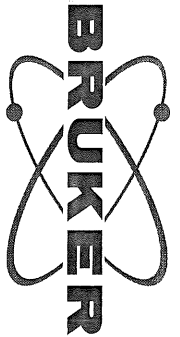

Current Data Parameters  
 NAME Indapina-11HMDS-12-041411  
 EXPNO 4  
 PROCNO 1

F2 - Acquisition Parameters

Date\_ 20110418  
 Time 12.02  
 INSTRUM spect  
 PROBHD 5 mm BBO BB-1H  
 PULPROG zgpg30  
 TD 65536  
 SOLVENT CDCl3  
 NS 225  
 DS 4  
 SWH 30030.029 Hz  
 FIDRES 0.458222 Hz  
 AQ 1.0912410 sec  
 RG 4597.6  
 DW 16.650 usec  
 DE 7.00 usec  
 TE 297.1 K  
 D1 1.00000000 sec  
 d11 0.03000000 sec  
 TDO 1

==== CHANNEL f1 =====

NUC1 13C  
 P1 8.60 usec  
 PL1 1.00 dB  
 SFO1 125.7703640 MHz

==== CHANNEL f2 =====

CPDPRG2 waltz16  
 NUC2 1H  
 PCPD2 100.00 usec  
 PL2 1.00 dB  
 PL12 17.50 dB  
 SFO2 500.1322150 MHz

F2 - Processing parameters

SI 32768  
 SF 125.7577919 MHz  
 WDM EM  
 SSB 0  
 LB 1.00 Hz  
 GB 0  
 PC 1.40

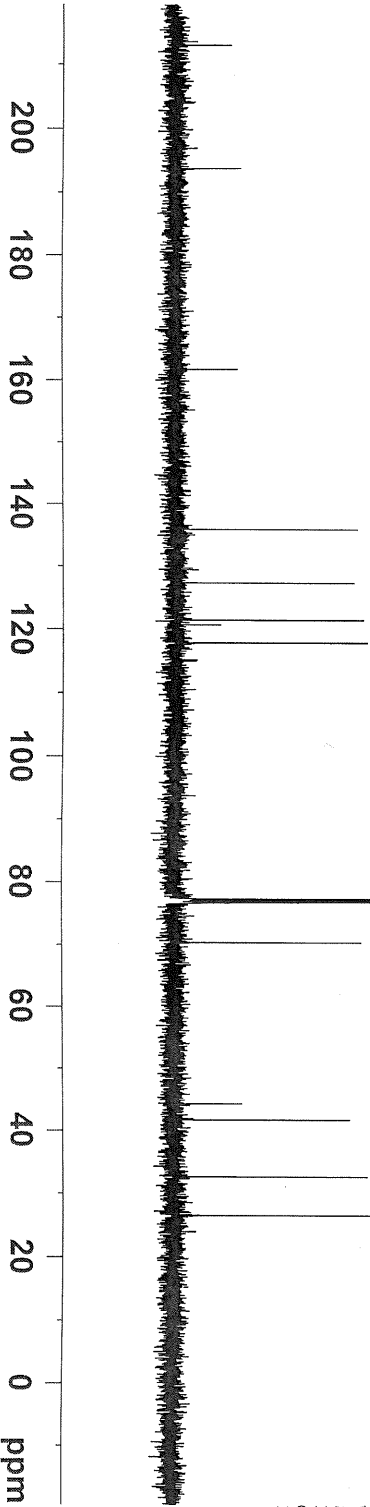

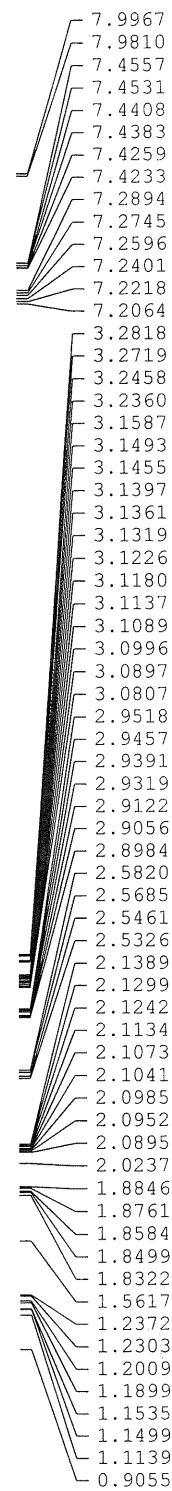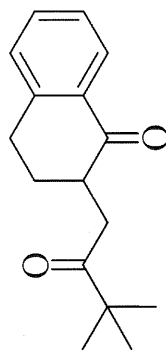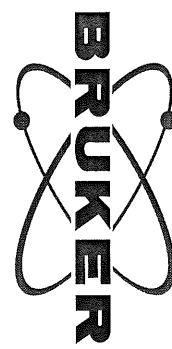

Current Data Parameters  
 NAME atelPina-11HMDS-12-042711  
 EXPNO 3  
 PROCNO 1

F2 - Acquisition Parameters  
 Date\_ 20110427  
 Time\_ 16.30  
 INSTRUM spect  
 PROBHD 5 mm BBO BB-1H  
 PULPROG zg30  
 TD 32768  
 SOLVENT CDCl3  
 NS 4  
 DS 0  
 SWH 10000.000 Hz  
 FIDRES 0.305176 Hz  
 AQ 1.6385000 sec  
 RG 406.4  
 DW 50.000 usec  
 DE 6.50 usec  
 TE 296.1 K  
 D1 1.00000000 sec  
 TD0 1

==== CHANNEL f1 =====  
 NUC1 1H  
 P1 14.00 usec  
 PL1 1.00 dB  
 SFO1 500.1345012 MHz  
 F2 - Processing parameters  
 SI 500.1300232 MHz  
 SF 500.1300232 MHz  
 WDW EM  
 SSB 0  
 LB 0.30 Hz  
 GB 0  
 PC 1.00

CF-Er15-16  
13C

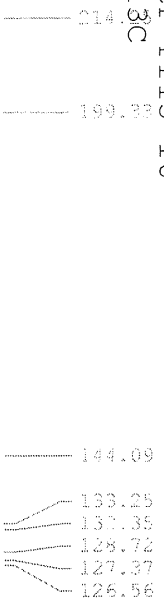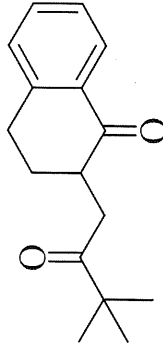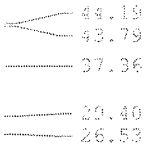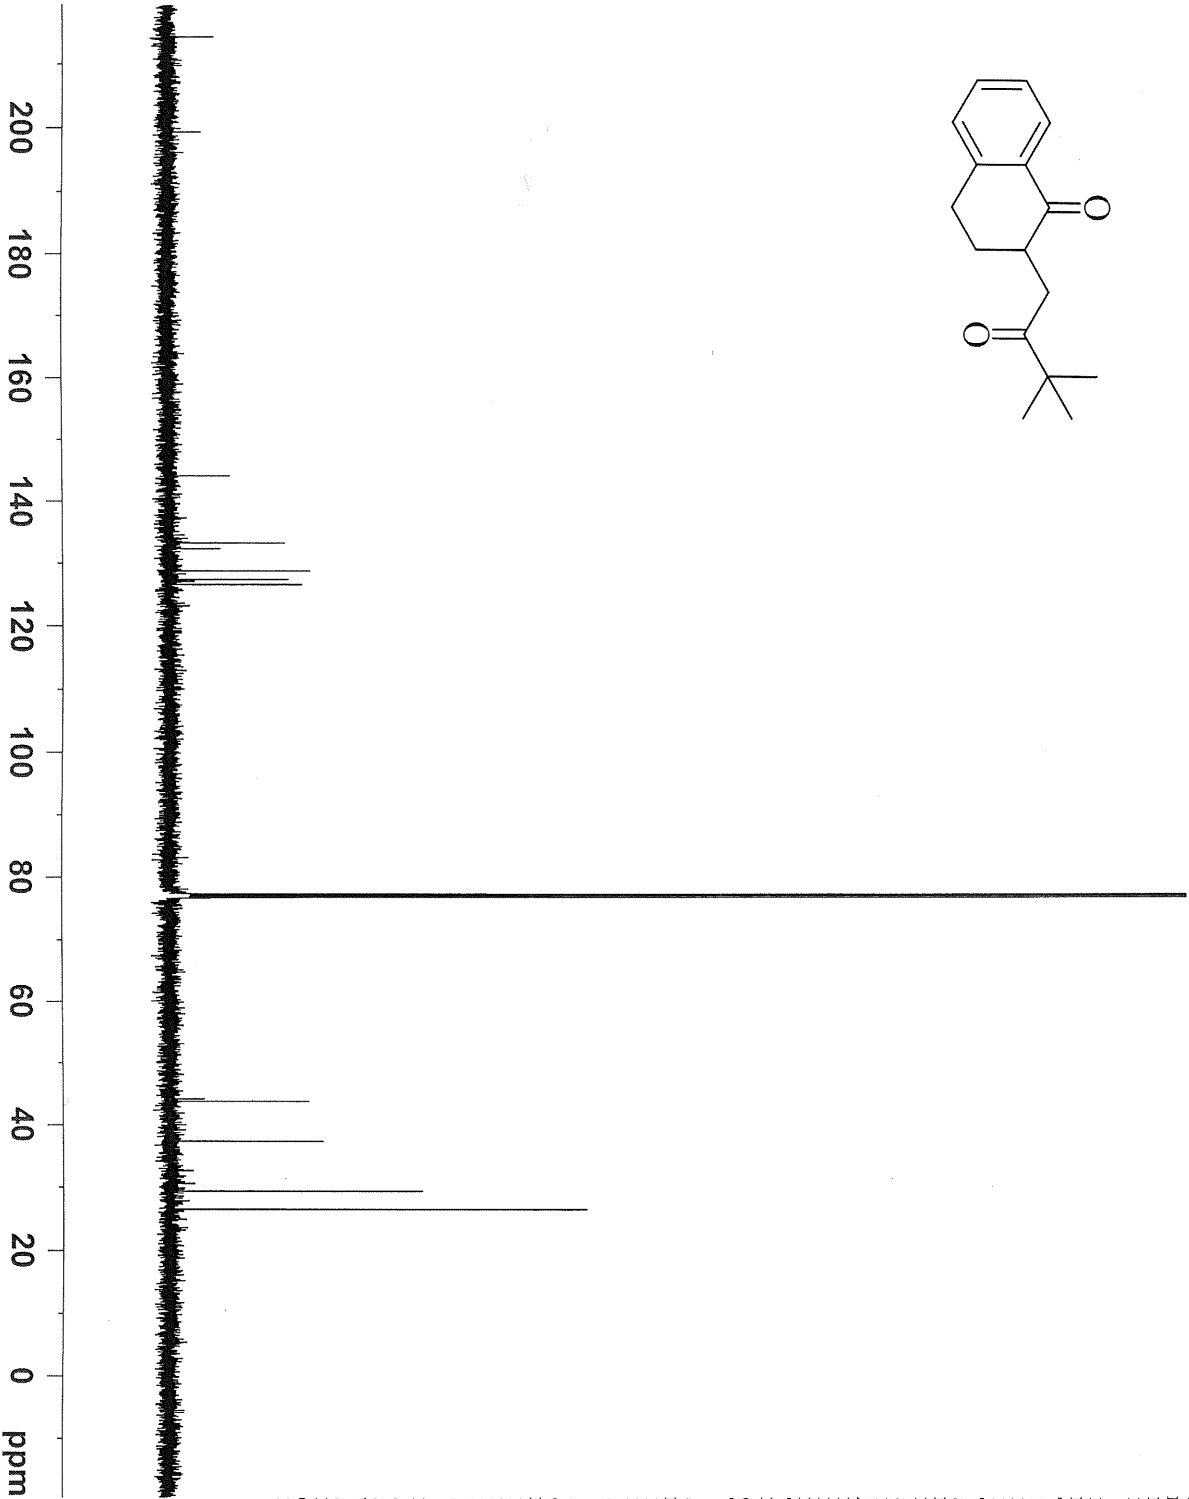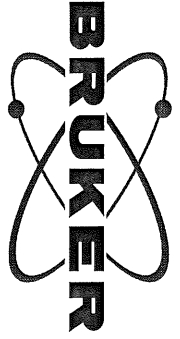

Current Data Parameters  
 NAME arecPina-LiHMDS-12-042711  
 EXPNO 4  
 PROCNO 1

F2 - Acquisition Parameters  
 Date\_ 20110427  
 Time\_ 16:35  
 INSTRUM spect  
 PROBHD 5 mm BBO BB-1H  
 PULPROG zgpgc30  
 TD 65536  
 SOLVENT CDCl3  
 NS 401  
 DS 4  
 SWH 30030.029 Hz  
 FIDRES 0.458222 Hz  
 AQ 1.0912410 sec  
 RG 4096  
 DW 16.650 usec  
 DE 7.00 usec  
 TE 296.5 K  
 D1 1.00000000 sec  
 d11 0.03000000 sec  
 TDO 1

==== CHANNEL f1 =====  
 NUC1 13C  
 P1 8.60 usec  
 PL1 1.00 dB  
 SFO1 125.7703640 MHz

==== CHANNEL f2 =====  
 CPDPRG2 waltz16  
 NUC2 1H  
 PCPD2 100.00 usec  
 PL2 1.00 dB  
 PL12 17.50 dB  
 SFO2 500.1322150 MHz

F2 - Processing parameters  
 SI 32768  
 SF 125.7577924 MHz  
 WDM EM  
 SSB 0  
 LB 1.00 Hz  
 GB 0  
 PC 1.40
